# Supplementary material
Source: PubMed Central journal article supplement (PMC3889561)
Supplement: MCB.00873-13_zmb999100218so1.pdf [file MCB.00873-13_zmb999100218so1.pdf]

# SUPPLEMENTAL INFORMATION

## **Monosome Formation during Translation Initiation Requires the SR Protein Npl3**

**Claudia Baierlein<sup>1</sup>, Alexandra Hackmann<sup>1</sup>, Thomas Gross<sup>1,2</sup>, Lysann Henker<sup>1</sup>,  
Frederik Hinz<sup>1</sup> and Heike Krebber<sup>1,\*</sup>**

*<sup>1</sup>Abteilung für Molekulare Genetik, Institut für Mikrobiologie und Genetik, Göttinger Zentrum für Molekulare Biowissenschaften (GZMB), Georg-August Universität Göttingen, Grisebachstr. 8, 37077 Göttingen, Germany*

*<sup>2</sup>Current address: Department of Genetics, Harvard Medical School, 77 Avenue Louis Pasteur, Boston, MA 02115, USA*

\*Correspondence: [heike.krebber@biologie.uni-goettingen.de](mailto:heike.krebber@biologie.uni-goettingen.de)

Keywords: Regulation of translation; translation initiation; SR-protein; Npl3; Rpl10; eIF5B; Fun12; mRNA export; pre-60S export; ribosome; monosome

Running title: SR-protein Npl3 is important for monosome formation

TABLE S1. Yeast strains

| Strain number | Genotype                                                                                                        | Source                |
|---------------|-----------------------------------------------------------------------------------------------------------------|-----------------------|
| HKY36         | <i>MATα ura3-52 leu2Δ1 his3-200</i>                                                                             | Fred Winston, Boston  |
| HKY45         | <i>MATα ura leu ade2 xpo1::LEU2 + p CEN HIS3 xpo1-1</i>                                                         | this study            |
| HKY77         | <i>MATα ura leu his trp rpb1-1</i>                                                                              | (1)                   |
| HKY124        | <i>MATα ura3-52 leu2Δ1 his3Δ200 rat7-1</i>                                                                      | (2)                   |
| HKY157        | <i>MATα ura3 leu2 his3 ade npl3::HIS3 + p CEN URA3 NPL3-myc</i>                                                 | (3)                   |
| HKY160        | <i>MATα ura3-1 leu2 his3 lys2 ade2 ade3 npl3::HIS3 + p CEN LEU2 npl3-17</i>                                     | (4)                   |
| HKY265        | <i>MATα ura3-52 leu2-3,112 trp1-901 his3Δ200 gal4Δ gal80Δ</i>                                                   | Clontech              |
| HKY270        | <i>MATα ura leu ade trp1 mtr10::HIS3 + p CEN TRP1 mtr10-7</i>                                                   | (5)                   |
| HKY380        | <i>MATα ura3Δ0 leu2Δ0 his3Δ1 met15Δ0 npl3::kanMX4</i>                                                           | Euroscarf             |
| HKY381        | <i>MATα ura3Δ0 leu2Δ0 his3Δ1 lys2Δ0</i>                                                                         | Euroscarf             |
| HKY408        | <i>MATα ura3 leu2 trp1 his3 prt1-1</i>                                                                          | Mark Ashe, Manchester |
| HKY705        | <i>MATα ura3 leu2 trp1 his3 rix1-1</i>                                                                          | (6)                   |
| HKY611        | <i>MATα ura3 leu2 his3 npl3::kanMX4 rat7-1</i>                                                                  | this study            |
| HKY644        | <i>MATα ura3 leu2 trp1 his3 ade2 mex67::HIS3 + p CEN LEU2 mex67-5</i>                                           | (7)                   |
| HKY749        | <i>MATα ura3Δ0 leu2Δ0 his3Δ1 npl3::kanMX4 fun12::kanMX4 + p CEN URA3 NPL3</i>                                   | this study            |
| HKY802        | <i>MATα ura3Δ0 leu2Δ0 his3Δ1 lys2Δ0 RPL25-3xmyc:HIS3MX6</i>                                                     | (8)                   |
| HKY805        | <i>MATα ura3Δ0 leu2Δ0 his3Δ1 met15Δ0 npl3::kanMX4 RPL25-3xmyc:HIS3MX6</i>                                       | (8)                   |
| HKY812        | <i>MATα ura3Δ0 leu2Δ0 his3Δ1 lys2Δ0 lsg1::kanMX4 + p CEN LEU2 lsg1-2</i>                                        | this study            |
| HKY816        | <i>MATα ura3Δ0 leu2Δ0 his3Δ1 lys2Δ0 lsg1::kanMX4 + p CEN LEU2 lsg1-3</i>                                        | this study            |
| HKY858        | <i>MATα ura3Δ0 leu2Δ0 his3Δ1 rpl10::kanMX4 + p CEN URA3 RPL10-GFP</i>                                           | this study            |
| HKY863        | <i>MATα ura3Δ0 leu2Δ0 his3Δ1 lys2Δ0 rpl10::kanMX4 + p CEN URA3 rpl10(G161D)-GFP</i>                             | this study            |
| HKY890        | <i>MATα ura3 leu2 his3 lys2 mtr2::kanMX4 + p CEN TRP1 mtr2-21 + p CEN URA3 MTR2</i>                             | (6)                   |
| HKY892        | <i>MATα ura3 leu2 his3 lys2 mtr2::kanMX4 + p CEN TRP1 mtr2-33 + p CEN URA3 MTR2</i>                             | (6)                   |
| HKY894        | <i>MATα ura3 leu2 his3 lys2 nmd3::kanMX4 + p CEN TRP1 nmd3-2 + p CEN URA3 NMD3</i>                              | (6)                   |
| HKY906        | <i>MATα ura3Δ0 leu2Δ0 his3Δ0 trp1::kanMX4 mtr2::kanMX4 + p CEN TRP1 mtr2-21 + p CEN URA3 MTR2</i>               | this study            |
| HKY918        | <i>MATα ura3Δ0 leu2Δ0 his3Δ1 trp1::kanMX4 fun12::kanMX4 mtr2::kanMX4 + p CEN TRP1 mtr2-21 + p CEN URA3 MTR2</i> | this study            |
| HKY931        | <i>MATα ura3Δ0 leu2Δ0 his3Δ1 trp1::kanMX4</i>                                                                   | this study            |
| HKY934        | <i>MATα ura3Δ0 leu2Δ0 his3Δ1 npl3::kanMX4 trp1::kanMX4</i>                                                      | this study            |
| HKY949        | <i>MATα ura3Δ0 leu2Δ0 his3Δ1 met15Δ0 fun12::kanMX4</i>                                                          | Euroscarf             |
| HKY991        | <i>MATα rpl10::kanMX4 trp1::kanMX4 + p CEN URA3 RPL10-GFP</i>                                                   | this study            |
| HKY994        | <i>MATα rpl10::kanMX4 npl3::kanMX4 trp1::kanMX4 + p CEN URA3 RPL10-GFP</i>                                      | this study            |
| HKY1047       | <i>MATα ura3 leu2 his3 trp1 rio2::kanMX4 + p CEN LEU2 rio2-1</i>                                                | (9)                   |

|         |                                                                                                                                                                                     |            |
|---------|-------------------------------------------------------------------------------------------------------------------------------------------------------------------------------------|------------|
| HKY1056 | <i>MAT<math>\alpha</math> ura3 leu2 his3 lys2 trp1 fun12::kanMX4 rix1-1</i>                                                                                                         | this study |
| HKY1058 | <i>MAT<math>\alpha</math> ura3 leu2 his3 lys2 trp1 fun12::kanMX4 rio2::kanMX4</i><br>+ <i>p CEN LEU2 rio2-1</i>                                                                     | this study |
| HKY1243 | <i>MAT<math>\alpha</math> ura3<math>\Delta</math>0 leu2<math>\Delta</math>0 his3<math>\Delta</math>1 lys2<math>\Delta</math>0 rpl10::kanMX4</i><br>+ <i>p CEN HIS3 rpl10(G161D)</i> | this study |

TABLE S2. Plasmids

| Plasmid number | Features                                                                                                                                 | Source     |
|----------------|------------------------------------------------------------------------------------------------------------------------------------------|------------|
| pHK12          | <i>CEN URA3 P<sub>ADH</sub>-NLS-NES-GFP-GFP</i>                                                                                          | (10)       |
| pHK25          | <i>CEN LEU2 NPL3</i>                                                                                                                     | this study |
| pHK87          | <i>CEN LEU2</i>                                                                                                                          | (11)       |
| pHK88          | <i>CEN URA3</i>                                                                                                                          | (11)       |
| pHK103         | <i>2<math>\mu</math> LEU2</i>                                                                                                            | (12)       |
| pHK104         | <i>2<math>\mu</math> URA3</i>                                                                                                            | (12)       |
| pHK119         | ampR GST(pGEX4T-1)                                                                                                                       | Pharmacia  |
| pHK144         | <i>2<math>\mu</math> URA3 P<sub>GAL</sub>-GFP-NPL3</i>                                                                                   | (4)        |
| pHK145         | <i>2<math>\mu</math> URA3 P<sub>GAL</sub>-GFP-C-NPL3</i>                                                                                 | this study |
| pHK154         | <i>CEN LEU2 npl3-17</i>                                                                                                                  | (4)        |
| pHK195         | <i>2<math>\mu</math> URA3 NPL3</i>                                                                                                       | (4)        |
| pHK230         | <i>2<math>\mu</math> URA3 P<sub>GAL</sub>-GFP</i>                                                                                        | (4)        |
| pHK285         | <i>2<math>\mu</math> LEU2 MTR2</i>                                                                                                       | (13)       |
| pHK391         | <i>2<math>\mu</math> TRP1 GAL4 DNA-BD</i>                                                                                                | Clonetech  |
| pHK392         | <i>2<math>\mu</math> LEU2 GAL4 AD</i>                                                                                                    | Clonetech  |
| pHK418         | <i>CEN LEU2 GFP-NPL3</i>                                                                                                                 | (14)       |
| pHK501         | <i>2<math>\mu</math> TRP1 P<sub>ADH</sub>-GAL4-BD-myc-NPL3</i>                                                                           | this study |
| pHK598         | <i>2<math>\mu</math> LEU2 ADE3 NPL3</i>                                                                                                  | this study |
| pHK697         | <i>CEN URA3 RPS2-GFP</i>                                                                                                                 | (15)       |
| pHK698         | <i>CEN URA3 RPL25-GFP</i>                                                                                                                | (16)       |
| pHK718         | <i>2<math>\mu</math> ADE3 URA3 NMD3</i>                                                                                                  | (17)       |
| pHK719         | <i>2<math>\mu</math> LEU2 NMD3</i>                                                                                                       | (17)       |
| pHK747         | <i>CEN URA3 RPL10-GFP</i>                                                                                                                | this study |
| pHK758         | <i>CEN TRP1 rpl10(G161D)-GFP</i>                                                                                                         | this study |
| pHK763         | <i>2<math>\mu</math> TRP1 P<sub>ADH</sub>-GAL4-BD-NPL3</i>                                                                               | this study |
| pHK764         | <i>2<math>\mu</math> LEU2 P<sub>ADH</sub>-GAL4-AD-NPL3</i>                                                                               | this study |
| pHK765         | <i>CEN URA3 GFP-NPL3</i>                                                                                                                 | (8)        |
| pHK777         | <i>CEN LEU2 6xmyc-NPL3</i>                                                                                                               | this study |
| pHK805         | <i>2<math>\mu</math> LEU2 P<sub>ADH</sub>-GAL4-AD-npl3<math>\Delta</math>C (<math>\Delta</math>aa276-414)</i>                            | this study |
| pHK806         | <i>2<math>\mu</math> LEU2 P<sub>ADH</sub>-GAL4-AD-npl3<math>\Delta</math>N (<math>\Delta</math>aa1-125)</i>                              | this study |
| pHK809         | <i>2<math>\mu</math> LEU2 P<sub>ADH</sub>-GAL4-AD-npl3<math>\Delta</math>N<math>\Delta</math>C (<math>\Delta</math>aa1-113, 275-414)</i> | this study |
| pHK810         | <i>2<math>\mu</math> LEU2 P<sub>ADH</sub>-GAL4-AD-npl3<math>\Delta</math>N<math>\Delta</math>RRM1 (<math>\Delta</math>aa1-195)</i>       | this study |
| pHK812         | <i>2<math>\mu</math> TRP1 P<sub>GAL</sub>-GFP-C-NPL3</i>                                                                                 | this study |
| pHK829         | <i>2<math>\mu</math> LEU2 P<sub>ADH</sub>-GAL4-AD-npl3<math>\Delta</math>25 (<math>\Delta</math>aa390-414)</i>                           | this study |
| pHK830         | <i>2<math>\mu</math> LEU2 P<sub>ADH</sub>-GAL4-AD-npl3<math>\Delta</math>50 (<math>\Delta</math>aa365-414)</i>                           | this study |
| pHK831         | <i>2<math>\mu</math> LEU2 P<sub>ADH</sub>-GAL4-AD-npl3<math>\Delta</math>75 (<math>\Delta</math>aa340-414)</i>                           | this study |
| pHK832         | <i>2<math>\mu</math> LEU2 P<sub>ADH</sub>-GAL4-AD-npl3<math>\Delta</math>100 (<math>\Delta</math>aa315-414)</i>                          | this study |
| pHK833         | <i>2<math>\mu</math> LEU2 P<sub>ADH</sub>-GAL4-AD-npl3<math>\Delta</math>125 (<math>\Delta</math>aa290-414)</i>                          | this study |
| pHK835         | <i>CEN LEU2 npl3<math>\Delta</math>50 (<math>\Delta</math>aa365-414)</i>                                                                 | this study |
| pHK836         | <i>CEN LEU2 npl3<math>\Delta</math>75 (<math>\Delta</math>aa340-414)</i>                                                                 | this study |
| pHK837         | <i>CEN LEU2 npl3<math>\Delta</math>100 (<math>\Delta</math>aa315-414)</i>                                                                | this study |
| pHK838         | <i>CEN LEU2 npl3<math>\Delta</math>125 (<math>\Delta</math>aa290-414)</i>                                                                | this study |
| pHK845         | <i>6xHIS-NPL3</i>                                                                                                                        | (8)        |
| pHK883         | <i>CEN URA3 P<sub>ADH</sub>-GFP-GFP</i>                                                                                                  | this study |

---

|         |                                                  |            |
|---------|--------------------------------------------------|------------|
| pHK1227 | <i>2μ URA3 P<sub>GAL</sub>-GFP-NES-C-NPL3</i>    | this study |
| pHK1234 | <i>2μ URA3 FLAG-FUN12</i>                        | (18)       |
| pHK1274 | <i>CEN LEU2 NLS-npl3Δ100</i>                     | this study |
| pHK1276 | <i>GST-NPL3</i>                                  | this study |
| pHK1291 | <i>CEN HIS3 rpl10(G161D)</i>                     | this study |
| pHK1302 | <i>2μ URA3 RPL10</i>                             | this study |
| pHK1303 | <i>CEN URA3 P<sub>ADH</sub>-GFP-NPL3</i>         | this study |
| pHK1304 | <i>CEN URA3 P<sub>ADH</sub>-GFP-npl3Δ100</i>     | this study |
| pHK1305 | <i>CEN URA3 P<sub>ADH</sub>-GFP-NLS-npl3Δ100</i> | this study |
| pHK1321 | <i>CEN URA3 N-GFP-NPL3</i>                       | this study |
| pHK1322 | <i>CEN LEU2 C-GFP-NPL3</i>                       | this study |
| pHK1367 | <i>CEN URA3 N-GFP-npl3Δ100</i>                   | this study |

---

## REFERENCES

1. **Lei EP, Krebber H, Silver PA.** 2001. Messenger RNAs are recruited for nuclear export during transcription. *Genes and Development* **15**:1771–1782.
2. **Gorsch LC, Dockendorff TC, Cole CN.** 1995. A Conditional Allele of the Novel Repeat-containing Yeast Nucleoporin. *The Journal of cell biology* **129**:939–955.
3. **Shen EC, Henry MF, Weiss VH, Valentini SR, Silver P a., Lee MS.** 1998. Arginine methylation facilitates the nuclear export of hnRNP proteins. *Genes & Development* **12**:679–691.
4. **Lee MS, Henry M, Silver P a.** 1996. A protein that shuttles between the nucleus and the cytoplasm is an important mediator of RNA export. *Genes & Development* **10**:1233–1246.
5. **Senger B, Simos G, Bischoff FR, Podtelejnikov a, Mann M, Hurt E.** 1998. Mtr10p functions as a nuclear import receptor for the mRNA-binding protein Npl3p. *The EMBO journal* **17**:2196–207.
6. **Bassler J, Grandi P, Gadal O, Lessmann T, Petfalski E, Tollervey D, Lechner J, Hurt E.** 2001. Identification of a 60S preribosomal particle that is closely linked to nuclear export. *Molecular cell* **8**:517–29.
7. **Segref A, Sharma K, Doye V, Hellwig A, Huber J, Lührmann R, Hurt E.** 1997. Mex67p, a novel factor for nuclear mRNA export, binds to both poly(A)<sup>+</sup> RNA and nuclear pores. *The EMBO journal* **16**:3256–71.
8. **Hackmann A, Gross T, Baierlein C, Krebber H.** 2011. The mRNA export factor Npl3 mediates the nuclear export of large ribosomal subunits. *EMBO reports* **12**:1024–31.
9. **Schäfer T, Strauß D, Petfalski E, Tollervey D, Hurt E.** 2003. The path from nucleolar 90S to cytoplasmic 40S. *The EMBO journal* **22**:1370–1380.
10. **Taura T, Krebber H, Silver P a.** 1998. A member of the Ran-binding protein family, Yrb2p, is involved in nuclear protein export. *Proceedings of the National Academy of Sciences of the United States of America* **95**:7427–32.
11. **Sikorski R, Hieter P.** 1989. A System of Shuttle Vectors and Yeast Host Strains Designed for Efficient Manipulation of DNA in *Saccharomyces cerevisiae*. *Genetics* **122**:19–27.
12. **Christianson TW, Sikorski RS, Dante M, Shero JH, Hieter P.** 1992. Multifunctional yeast high-copy-number shuttle vectors. *Gene* **110**:119–22.
13. **Santos-Rosa H, Moreno H, Simos G, Segref A, Fahrenkrog B, Panté N, Hurt E.** 1998. Nuclear mRNA export requires complex formation between Mex67p and Mtr2p at the nuclear pores. *Molecular and cellular biology* **18**:6826–38.
14. **Gilbert W, Siebel CW, Guthrie C.** 2001. Phosphorylation by Sky1p promotes Npl3p shuttling and mRNA dissociation. *RNA (New York, N.Y.)* **7**:302–13.
15. **Milkereit P, Strauss D, Bassler J, Gadal O, Kühn H, Schütz S, Gas N, Lechner J, Hurt E, Tschochner H.** 2003. A Noc complex specifically involved in the formation and nuclear export of ribosomal 40 S subunits. *The Journal of biological chemistry* **278**:4072–81.
16. **Gadal O, Strauß D, Kessl J, Trumpower B, Tollervey D, Hurt ED.** 2001. Nuclear Export of 60S Ribosomal Subunits Depends on Xpo1p and Requires a Nuclear Export Sequence-Containing Factor , Nmd3p , That Associates with the Large Subunit Protein Rpl10p. *Molecular and cellular biology* **21**:3405–3415.

17. **Hedges J, West M, Johnson AW.** 2005. Release of the export adapter, Nmd3p, from the 60S ribosomal subunit requires Rpl10p and the cytoplasmic GTPase Lsg1p. *The EMBO journal* **24**:567–79.
18. **Choi SK, Olsen DS, Roll-Mecak a, Martung a, Remo KL, Burley SK, Hinnebusch a G, Dever TE.** 2000. Physical and functional interaction between the eukaryotic orthologs of prokaryotic translation initiation factors IF1 and IF2. *Molecular and cellular biology* **20**:7183–91.

## STRAINS AND PLASMIDS USED IN ALL FIGURES

### FIG 1.

A: *E. coli* BL21(DE3), pHK119, pHK845, pHK1276

C: HKY265, pHK763, pHK764, pHK829-833

D: HKY157, pHK25, pHK87, pHK835-838, pHK1274

E: HKY157, pHK25, pHK894, pHK835-837

F: HKY36, pHK1303-1305

G: HKY380, HKY611, pHK25, pHK894, pHK835-837

H: HKY157, pHK25, pHK835-837, pHK1274, HKY160, HKY644

I: HKY157, pHK25, pHK835-837, HKY160, HKY45, pHK698

### FIG 2.

A: HKY36, pHK87, HKY408, HKY157, pHK835-837, HKY160

B: HKY157, pHK25, pHK837, HKY949, HKY863, HKY160, HKY890 (selected on FOA), HKY892 (selected on FOA), HKY894 (selected on FOA), HKY124

### FIG 3.

A: HKY36, HKY157, pHK25, pHK837, HKY863

B: HKY802, HKY805, pHK835, pHK837, HKY36

C: HKY36, HKY157, pHK25, pHK837, HKY894 (selected on FOA)

D: HKY157, pHK25, pHK837, HKY36

### FIG 4.

A: HKY934, pHK777, pHK765, pHK812

B: HKY36, pHK144, pHK145, pHK1227

C: HKY36, pHK144, pHK145, pHK1227

D: HKY36, HKY270, pHK1321, pHK1322, pHK1367

E: HKY36, pHK144, pHK145, pHK230, pHK1227

### FIG 5.

A: HKY381, HKY380, pHK837, pHK154, HKY994, pHK758, HKY949, HKY890, HKY705, HKY1047, HKY749, HKY918, ,HKY1056, HKY1058

B: HKY36, pHK104, pHK195, HKY812, HKY863, pHK103, pHK598, pHK285, pHK719, HKY816, HKY949

C: HKY863, pHK103, pHK719, pHK598

D: HKY1243, pHK698, pHK103, pHK598

E: HKY157, pHK837, pHK104, pHK1234, pHK1302, pHK718

### FIG 6.

A: HKY36, pHK697

B: HKY157, pHK25, pHK837, pHK747

C: HKY36, pHK1303, pHK1304

D: HKY36, pHK1303, pHK1304

### FIG S1.

HKY265, pHK763, pHK764, pHK391, pHK392, pHK806, pHK805, pHK809, pHK810

### FIG S2.

HKY157, pHK25, pHK837, pHK836, pHK835

### FIG S3.

HKY36, pHK144, pHK145, pHK1227, pHK812

# FIGURES

## Figure S1

**A**

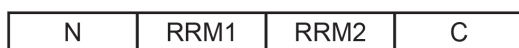

**B**

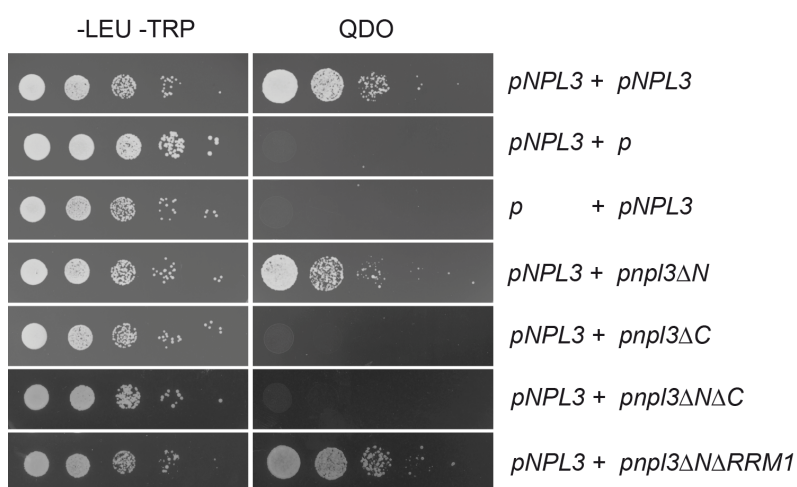

**FIG S1. The C-terminal domain of Npl3 is crucial for homodimerization.** (A) Schematic overview of the domain organization of Npl3. (N) N-terminal domain, (RRM1 and RRM2) RNA recognition motifs, (C) C-terminal domain. (B) Cells carrying full length *NPL3* in combination with either truncated versions of *NPL3* or empty vectors were spotted in serial dilutions onto quadruple drop out plates (QDO) for interaction studies in the Yeast-two-hybrid system. The growth was verified on plates lacking tryptophan and leucine (-Trp -Leu) upon incubation at 25°C for 3 days.



## Figure S2

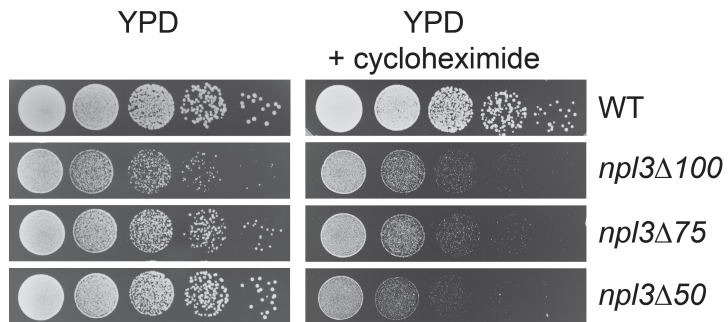

**FIG S2. The C-terminal domain of Npl3 is important for the growth in the presence of cycloheximide.** Serial dilutions of the indicated strains were spotted onto YPD plates without or with 0,04  $\mu\text{g/ml}$  cycloheximide. The plates were incubated for 3 days at 25°C.

**Figure S3**

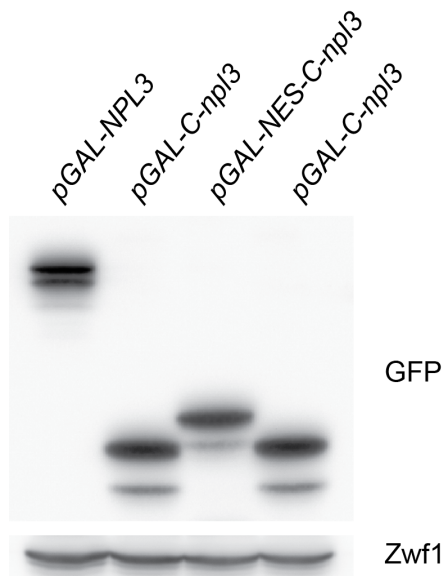

**FIG S3. High copy plasmids encoding *NPL3* lead to a similar protein production.** Expression levels of multicopy plasmids used in FIG 4 were determined in wildtype cells by western blot analyses with anti-GFP antibodies. Equal loading is shown by the detection of Zwfl.
